# Supplementary material
Source: PubMed Central journal article supplement (PMC4434696)
Supplement: pnas.201502740SI.pdf [file pnas.201502740SI.pdf]

# Supporting Information

Urs et al. 10.1073/pnas.1502740112

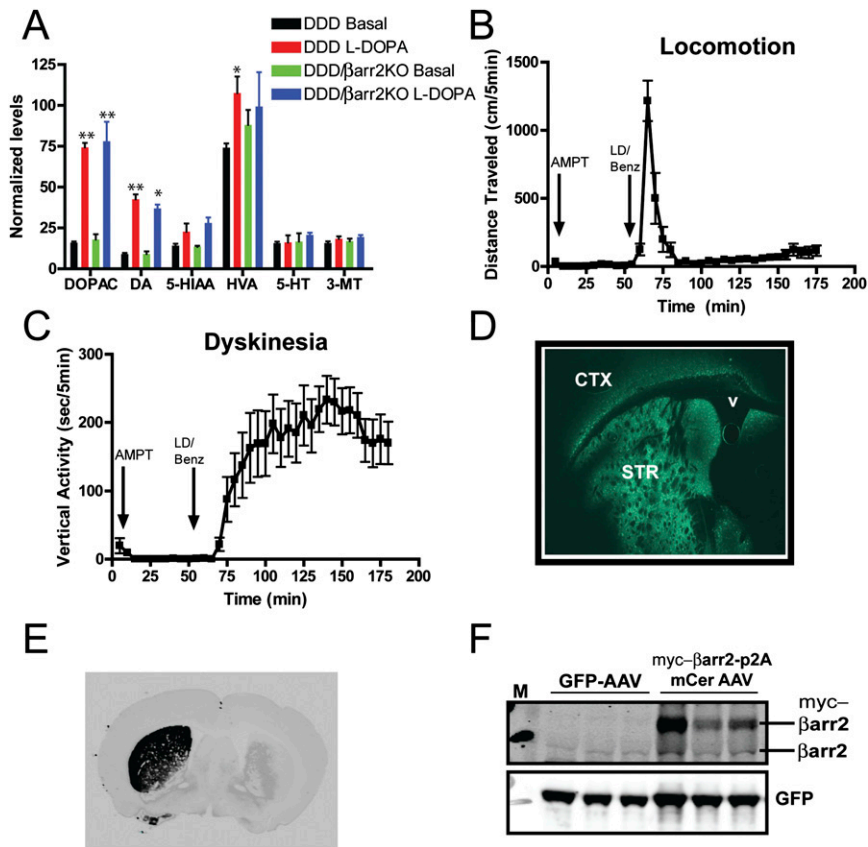

**Fig. S1.** (A) HPLC analysis of catecholamine metabolites. Upon L-DOPA administration similar increases in 3,4-dihydroxyphenylacetic acid (DOPAC), dopamine (DA), 5-hydroxyindoleacetic acid (5-HIAA), and homovanillic acid (HVA) are observed in DDD/WT vs. DDD/βarr2KO mice. \* $P < 0.05$ , \*\* $P < 0.01$  L-DOPA treatment compared with basal. (B) Locomotion and (C) dyskinesia activity after 100 mg/kg i.p. acute dose of L-DOPA in DDD/WT mice. (D) Representative image of βarr2AAV injection in the striatum of DAT-KO mice. CTX, cortex; STR, striatum; V, ventricle. (E) Representative image of 6-OHDA lesioned mouse striatum. (F) Representative Western blot of AAV-induced GFP or βarr2 overexpression in 6-OHDA lesioned mice. Myc-tagged βarr2 has higher molecular weight than endogenous βarr2 owing to the myc epitope tag and the p2A sequence.
